# Supplementary material for: Machine learning links unresolving secondary pneumonia to mortality in patients with severe pneumonia, including COVID-19
Source: JCI journal article supplement (doi:10.1172/jci170682), 2023-04-27
Supplement: sd2 [file 2]

## Investigator SCRIPT Pneumonia and Viral Episode Assessment and Outcome Evaluation

Study ID: \_\_\_\_\_

Reviewer  1  2  3  CR: \_\_\_\_\_  
Date

|                                                                                                                                                                                                                                                                                                                                                                                                                                                                                                                                                                         |                                                                                                                                                                                                                                                                                                                                                                                                                                                               |                                    |  |
|-------------------------------------------------------------------------------------------------------------------------------------------------------------------------------------------------------------------------------------------------------------------------------------------------------------------------------------------------------------------------------------------------------------------------------------------------------------------------------------------------------------------------------------------------------------------------|---------------------------------------------------------------------------------------------------------------------------------------------------------------------------------------------------------------------------------------------------------------------------------------------------------------------------------------------------------------------------------------------------------------------------------------------------------------|------------------------------------|--|
| <input type="radio"/> N/A – go to page 2                                                                                                                                                                                                                                                                                                                                                                                                                                                                                                                                |                                                                                                                                                                                                                                                                                                                                                                                                                                                               | <b>Episode Category Assessment</b> |  |
| Is this for the initial pneumonia episode?<br><br><b>Date of BAL in REDCap:</b> _____                                                                                                                                                                                                                                                                                                                                                                                                                                                                                   | <input type="radio"/> Yes, this is the initial pneumonia episode (implies > 1 episodes)<br><input type="radio"/> Yes, this is the initial and also final pneumonia episode<br><input type="radio"/> No, multiple episodes                                                                                                                                                                                                                                     |                                    |  |
| If not initial, is this the final pneumonia episode?                                                                                                                                                                                                                                                                                                                                                                                                                                                                                                                    | <input type="radio"/> Yes <input type="radio"/> No <input type="radio"/> N/A                                                                                                                                                                                                                                                                                                                                                                                  |                                    |  |
| <b>Patient Category:</b><br><input type="radio"/> Clinical CAP (not hospitalized within the last 7 days)<br><input type="radio"/> Clinical HAP (current admission >48 hours or discharged from a healthcare facility within the last 7 days where admission >24 hours)<br><input type="radio"/> Clinical VAP (on ventilator >48 hours or reintubated < 24 hours from extubation)<br><input type="radio"/> Non-pneumonia control*<br><input type="radio"/> Infection <sup>a</sup><br><input type="radio"/> Known Condition <sup>b</sup><br><input type="radio"/> Unknown | <b>*If non-pneumonia control, cause of infiltrate:</b><br><input type="radio"/> ARDS<br><input type="radio"/> Aspiration<br><input type="radio"/> Atelectasis<br><input type="radio"/> Fibrosis<br><input type="radio"/> Fluid overload<br><input type="radio"/> Heart failure/pulmonary edema<br><input type="radio"/> Pleural effusion<br><input type="radio"/> Pulmonary hemorrhage<br><input type="radio"/> Other: _____<br><input type="radio"/> Unknown |                                    |  |
| <sup>a</sup> <i>If infection:</i><br><input type="radio"/> Cholangitis/cholecystitis<br><input type="radio"/> Colitis<br><input type="radio"/> Other intra-abdominal<br><input type="radio"/> Line infection<br><input type="radio"/> Tracheobronchitis<br><input type="radio"/> Urinary tract<br><input type="radio"/> Wound/skin<br><input type="radio"/> Other: _____                                                                                                                                                                                                | <sup>b</sup> <i>If known condition, cause of fever/leukocytosis:</i><br><input type="radio"/> Aspiration<br><input type="radio"/> Atelectasis<br><input type="radio"/> Drug fever<br><input type="radio"/> Pancreatitis<br><input type="radio"/> Other: _____<br><input type="radio"/> None<br><input type="radio"/> Unknown                                                                                                                                  |                                    |  |
| <b>STOP here for non-pneumonia control</b>                                                                                                                                                                                                                                                                                                                                                                                                                                                                                                                              |                                                                                                                                                                                                                                                                                                                                                                                                                                                               |                                    |  |
| Choose one: (from Episode Category Assessment)<br><input type="radio"/> <b>Viral* only</b><br><input type="radio"/> <b>Bacterial/Viral* Co-Infection</b><br><input type="radio"/> <b>Bacterial/Etiology defined</b><br><input type="radio"/> <b>Culture-negative**</b> (%PMNs ≥ 50%)<br><input type="radio"/> <b>Culture-negative***</b> (%PMNs < 50%)<br><input type="radio"/> <b>Indeterminate</b>                                                                                                                                                                    | <sup>*</sup> <i>If viral, select virus type: (select all that apply)</i><br><input type="checkbox"/> Influenza<br><input type="checkbox"/> SARS-CoV-2<br><input type="checkbox"/> Other: _____                                                                                                                                                                                                                                                                |                                    |  |
| <b>Demographics page immune status is</b> <input type="radio"/> Immunocompromised <input type="radio"/> NON-Immunocompromised                                                                                                                                                                                                                                                                                                                                                                                                                                           |                                                                                                                                                                                                                                                                                                                                                                                                                                                               |                                    |  |
| <sup>**</sup> <i>If culture-negative (%PMNs ≥ 50%):</i><br><input type="radio"/> Immunocompromised<br><input type="radio"/> Nonimmunocompromised                                                                                                                                                                                                                                                                                                                                                                                                                        | <sup>***</sup> <i>If culture-negative (%PMNs &lt; 50%):</i><br><input type="radio"/> Neutropenic (ANC < 500/uL)<br><input type="radio"/> Immunocompromised<br><input type="radio"/> Nonimmunocompromised                                                                                                                                                                                                                                                      |                                    |  |

**Investigator SCRIPT Pneumonia and Viral Episode Assessment and Outcome Evaluation**

| If Viral Only <input type="radio"/> N/A                                   |                                                                                                                                                                                                                                                                                                                                                                                                                                                                                                                                                                                                        |
|---------------------------------------------------------------------------|--------------------------------------------------------------------------------------------------------------------------------------------------------------------------------------------------------------------------------------------------------------------------------------------------------------------------------------------------------------------------------------------------------------------------------------------------------------------------------------------------------------------------------------------------------------------------------------------------------|
| Were appropriate antivirals administered?                                 | <input type="radio"/> Yes* <input type="radio"/> No <input type="radio"/> N/A – no appropriate antivirals                                                                                                                                                                                                                                                                                                                                                                                                                                                                                              |
| <i>*If yes, select antiviral: (select all that apply)</i>                 | <input type="checkbox"/> Influenza – oseltamivir<br><input type="checkbox"/> Influenza-baloxavir<br><input type="checkbox"/> Influenza-peramivir<br><input type="checkbox"/> Influenza-other: _____<br><input type="checkbox"/> SARS-CoV-2-remdesivir<br><input type="checkbox"/> SARS-Cov-2-other: _____<br><input type="checkbox"/> Adenovirus-cidofovir<br><input type="checkbox"/> Herpes or Varicella-acyclovir<br><input type="checkbox"/> RSV-ribavirin only if immunocompromised<br><input type="checkbox"/> Other (please specify): _____                                                     |
| Were empirical antibiotics for this episode started prior to BAL?         | <input type="radio"/> Yes* <input type="radio"/> No                                                                                                                                                                                                                                                                                                                                                                                                                                                                                                                                                    |
| <i>*If yes, number of days prior to BAL collection?</i>                   | <input type="radio"/> ≤ 48 hours before BAL<br><input type="radio"/> > 48 hours before BAL                                                                                                                                                                                                                                                                                                                                                                                                                                                                                                             |
| Were empirical antibiotics <b>started/continued</b> after BAL collection? | <input type="radio"/> Yes* <input type="radio"/> No                                                                                                                                                                                                                                                                                                                                                                                                                                                                                                                                                    |
| <i>*If yes, select number of days antibiotics were given:</i>             | <input type="radio"/> < 72 hours after BAL<br><input type="radio"/> 3-7 days after BAL<br><input type="radio"/> 8-10 days after BAL<br><input type="radio"/> 11-14 days after BAL<br><input type="radio"/> ≥ 15 days after BAL                                                                                                                                                                                                                                                                                                                                                                         |
| Viral Pneumonia Clinical Impression                                       |                                                                                                                                                                                                                                                                                                                                                                                                                                                                                                                                                                                                        |
| Was viral retesting performed?                                            | <input type="radio"/> Yes*<br><input type="radio"/> No (go to Global Viral Clinical Impression)                                                                                                                                                                                                                                                                                                                                                                                                                                                                                                        |
| <i>*If yes, PCR cleared?</i>                                              | <input type="radio"/> Yes by BAL<br>Date of 1 <sup>st</sup> negative test with no subsequent positive: _____<br><br><input type="radio"/> Yes by NP/OP (no BAL available or subsequently completed)<br>Date of 1 <sup>st</sup> persistent negative test: _____<br><br><input type="radio"/> Other viral procedure: _____<br>Date of repeat test: _____<br><br><input type="radio"/> No<br>Date of last positive test: _____                                                                                                                                                                            |
| Global Viral Clinical Impression:<br>(Go to PCT after)                    | <b>Pneumonia (Check best answer)</b><br><input type="radio"/> Cure<br><input type="radio"/> Persistence (repeat positive PCR until death, transfer to LTAC, needs time interval from last testing [i.e. positive within 7 days])<br><input type="radio"/> Superinfection pneumonia (N/A if single episode only)<br><input type="radio"/> Indeterminate (NP positive but BAL clear, no recent PCR prior to death or transfer to other facility)<br><br><b>Other: (if applicable, all that apply)</b><br><input type="checkbox"/> Extrapulmonary infection (Single Viral) ( <i>see extra question</i> )* |

## Investigator SCRIPT Pneumonia and Viral Episode Assessment and Outcome Evaluation

If **\*extrapulmonary infection**, choose site (**check all that apply**) and corresponding documentation:

| Site ( <i>check all that apply</i> )                               | Documentation ( <i>check most appropriate – only one</i> ) |                                  |                         |                         |
|--------------------------------------------------------------------|------------------------------------------------------------|----------------------------------|-------------------------|-------------------------|
|                                                                    | Definitive with positive culture                           | Definitive without culture proof | Radiologic/imaging only | Clinical suspicion only |
| <input type="checkbox"/> Cholangitis/cholecystitis                 | <input type="radio"/>                                      | <input type="radio"/>            | <input type="radio"/>   | <input type="radio"/>   |
| <input type="checkbox"/> Colitis /C. diff                          | <input type="radio"/>                                      | <input type="radio"/>            | <input type="radio"/>   | <input type="radio"/>   |
| <input type="checkbox"/> Other intra-abdominal (SBP, abcess, etc.) | <input type="radio"/>                                      | <input type="radio"/>            | <input type="radio"/>   | <input type="radio"/>   |
| <input type="checkbox"/> Line infection                            | <input type="radio"/>                                      | <input type="radio"/>            | <input type="radio"/>   | <input type="radio"/>   |
| <input type="checkbox"/> Tracheobronchitis                         | <input type="radio"/>                                      | <input type="radio"/>            | <input type="radio"/>   | <input type="radio"/>   |
| <input type="checkbox"/> Urinary Tract                             | <input type="radio"/>                                      | <input type="radio"/>            | <input type="radio"/>   | <input type="radio"/>   |
| <input type="checkbox"/> Wound/skin                                | <input type="radio"/>                                      | <input type="radio"/>            | <input type="radio"/>   | <input type="radio"/>   |
| <input type="checkbox"/> Empyema (unrelated to the index pna)      | <input type="radio"/>                                      | <input type="radio"/>            | <input type="radio"/>   | <input type="radio"/>   |
| <input type="checkbox"/> Other ( <i>please specify</i> ):<br>_____ | <input type="radio"/>                                      | <input type="radio"/>            | <input type="radio"/>   | <input type="radio"/>   |

**If Bacterial/Viral Co-Infection**     N/A (Viral Only)

|                                                           |                                                                                                                                                                                                                                                                                                                                                                                                                                                                                                                                                    |
|-----------------------------------------------------------|----------------------------------------------------------------------------------------------------------------------------------------------------------------------------------------------------------------------------------------------------------------------------------------------------------------------------------------------------------------------------------------------------------------------------------------------------------------------------------------------------------------------------------------------------|
| Were appropriate antivirals administered?                 | <input type="radio"/> Yes* <input type="radio"/> No <input type="radio"/> N/A – no appropriate antivirals                                                                                                                                                                                                                                                                                                                                                                                                                                          |
| <i>*If yes, select antiviral: (select all that apply)</i> | <input type="checkbox"/> Influenza – oseltamivir<br><input type="checkbox"/> Influenza-baloxavir<br><input type="checkbox"/> Influenza-peramivir<br><input type="checkbox"/> Influenza-other: _____<br><input type="checkbox"/> SARS-CoV-2-remdesivir<br><input type="checkbox"/> SARS-CoV-2-other: _____<br><input type="checkbox"/> Adenovirus-cidofovir<br><input type="checkbox"/> Herpes or Varicella-acyclovir<br><input type="checkbox"/> RSV-ribavirin only if immunocompromised<br><input type="checkbox"/> Other (please specify): _____ |
| Was viral retesting performed?                            | <input type="radio"/> Yes*<br><input type="radio"/> No (go to <i>If initial sample, has the patient...</i> )                                                                                                                                                                                                                                                                                                                                                                                                                                       |
| <i>*If yes, PCR cleared?</i>                              | <input type="radio"/> Yes by BAL<br>Date of 1 <sup>st</sup> negative test with no subsequent positive: _____<br><br><input type="radio"/> Yes by NP/OP (no BAL available or subsequently completed)<br>Date of 1 <sup>st</sup> persistent negative test: _____<br><br><input type="radio"/> Other viral procedure: _____<br>Date of repeat test: _____<br><br><input type="radio"/> No<br>Date of last positive test: _____                                                                                                                        |

**Investigator SCRIPT Pneumonia and Viral Episode Assessment and Outcome Evaluation**

| <span style="background-color: #00ffff;">Continue If Bacterial/Viral Co-Infection</span> or <span style="background-color: #ffff00;">Complete If Bacterial Only</span> <input type="radio"/> N/A (Viral only)             |                                                                                                                                                                                                                                                                                                                                                                                                                                                                                                                                                                                                                                                                                       |
|---------------------------------------------------------------------------------------------------------------------------------------------------------------------------------------------------------------------------|---------------------------------------------------------------------------------------------------------------------------------------------------------------------------------------------------------------------------------------------------------------------------------------------------------------------------------------------------------------------------------------------------------------------------------------------------------------------------------------------------------------------------------------------------------------------------------------------------------------------------------------------------------------------------------------|
| If initial sample, has the patient been actively treated for pneumonia for <b>more</b> than 24 hours prior to sample collection?                                                                                          | <input type="radio"/> Yes* <input type="radio"/> No <input type="radio"/> N/A<br><br><b>BAL Collection Date/Time:</b> _____<br><i>(Obtain from EPIC - Microbiology)</i>                                                                                                                                                                                                                                                                                                                                                                                                                                                                                                               |
| <b>Starting antibiotics for pneumonia:</b> _____<br><br><b>Start date for antibiotics for pneumonia:</b> _____<br><br><i>*If <b>yes</b>, how many calendar days has patient been treated? (Day BAL – Day abx started)</i> | _____ days <input type="radio"/> N/A                                                                                                                                                                                                                                                                                                                                                                                                                                                                                                                                                                                                                                                  |
| Appropriate initial antibiotics?<br><i>(in the 72 hrs. preceding culture results)</i><br><br><i>*Refer to biofire results if applicable</i>                                                                               | <input type="radio"/> Yes <input type="radio"/> No <input type="radio"/> N/A – no bacterial pathogen                                                                                                                                                                                                                                                                                                                                                                                                                                                                                                                                                                                  |
| Were antibiotics for pneumonia discontinued on D 7-8?                                                                                                                                                                     | <input type="radio"/> Yes*<br><input type="radio"/> No<br><input type="radio"/> N/A**(death/transfer to another institution)<br><br><i>*if <b>Yes</b>, finish following clinical impression and go to PCT</i><br><i>**if <b>N/A</b>, skip “clinical impression” questions and go to PCT</i>                                                                                                                                                                                                                                                                                                                                                                                           |
| Clinical Impression                                                                                                                                                                                                       |                                                                                                                                                                                                                                                                                                                                                                                                                                                                                                                                                                                                                                                                                       |
| Clinical Impression at <b><u>D7-8</u></b> :<br><br><br><br><br><br><br><br><br><i>*must be actively treated at this time point</i>                                                                                        | <b>Pneumonia (Check best answers)</b><br><input type="radio"/> Cure<br><input type="checkbox"/> Persistence <i>(check all that apply)</i><br><input type="checkbox"/> Positive Culture<br><input type="checkbox"/> Positive PCR<br><input type="checkbox"/> Abscess / Cavity<br><input type="checkbox"/> Empyema<br><input type="checkbox"/> Endocarditis<br><input type="checkbox"/> Other: _____<br><input type="checkbox"/> Superinfection pneumonia<br><input type="checkbox"/> Indeterminate<br><br><b>Other: (if applicable, all that apply)</b><br><input type="checkbox"/> Extrapulmonary infection <i>(see extra question)*</i><br><input type="checkbox"/> Prophylaxis only |

## Investigator SCRIPT Pneumonia and Viral Episode Assessment and Outcome Evaluation

If **\*extrapulmonary infection**, choose site (**check all that apply**) and corresponding documentation:

| Site ( <i>check all that apply</i> )                               | Documentation ( <i>check most appropriate – only one</i> ) |                                  |                         |                         |
|--------------------------------------------------------------------|------------------------------------------------------------|----------------------------------|-------------------------|-------------------------|
|                                                                    | Definitive with positive culture                           | Definitive without culture proof | Radiologic/imaging only | Clinical suspicion only |
| <input type="checkbox"/> Cholangitis/cholecystitis                 | <input type="radio"/>                                      | <input type="radio"/>            | <input type="radio"/>   | <input type="radio"/>   |
| <input type="checkbox"/> Colitis /C. diff                          | <input type="radio"/>                                      | <input type="radio"/>            | <input type="radio"/>   | <input type="radio"/>   |
| <input type="checkbox"/> Other intra-abdominal (SBP, abcess, etc.) | <input type="radio"/>                                      | <input type="radio"/>            | <input type="radio"/>   | <input type="radio"/>   |
| <input type="checkbox"/> Line infection                            | <input type="radio"/>                                      | <input type="radio"/>            | <input type="radio"/>   | <input type="radio"/>   |
| <input type="checkbox"/> Tracheobronchitis                         | <input type="radio"/>                                      | <input type="radio"/>            | <input type="radio"/>   | <input type="radio"/>   |
| <input type="checkbox"/> Urinary Tract                             | <input type="radio"/>                                      | <input type="radio"/>            | <input type="radio"/>   | <input type="radio"/>   |
| <input type="checkbox"/> Wound/skin                                | <input type="radio"/>                                      | <input type="radio"/>            | <input type="radio"/>   | <input type="radio"/>   |
| <input type="checkbox"/> Empyema (unrelated to the index pna)      | <input type="radio"/>                                      | <input type="radio"/>            | <input type="radio"/>   | <input type="radio"/>   |
| <input type="checkbox"/> Other ( <i>please specify</i> ):<br>_____ | <input type="radio"/>                                      | <input type="radio"/>            | <input type="radio"/>   | <input type="radio"/>   |

|                                                                                                      |                                                                                                                                                                                                                                                                                                                                                                                                                                                                                                                                                                                                                                                                                                                                                                                                                                                                                |
|------------------------------------------------------------------------------------------------------|--------------------------------------------------------------------------------------------------------------------------------------------------------------------------------------------------------------------------------------------------------------------------------------------------------------------------------------------------------------------------------------------------------------------------------------------------------------------------------------------------------------------------------------------------------------------------------------------------------------------------------------------------------------------------------------------------------------------------------------------------------------------------------------------------------------------------------------------------------------------------------|
| <p>Were antibiotics for pneumonia discontinued on D10?</p>                                           | <p> <input type="radio"/> Yes*<br/> <input type="radio"/> No<br/> <input type="radio"/> N/A**(death/transfer to another institution)                 </p> <p><i>*if Yes, finish following clinical impression and go to PCT</i><br/> <i>**if N/A, skip "clinical impression" questions and go to PCT</i></p>                                                                                                                                                                                                                                                                                                                                                                                                                                                                                                                                                                   |
| <p>Clinical Impression at <b>D10</b>:</p> <p><i>*must be actively treated at this time point</i></p> | <p><b>Pneumonia (Check best answers)</b></p> <p> <input type="radio"/> Cure<br/> <input type="checkbox"/> Persistence (<i>check all that apply</i>)                 </p> <ul style="list-style-type: none"> <li><input type="checkbox"/> Positive Culture</li> <li><input type="checkbox"/> Positive PCR</li> <li><input type="checkbox"/> Abscess / Cavity</li> <li><input type="checkbox"/> Empyema</li> <li><input type="checkbox"/> Endocarditis</li> <li><input type="checkbox"/> Other: _____</li> </ul> <p> <input type="checkbox"/> Superinfection pneumonia<br/> <input type="checkbox"/> Indeterminate                 </p> <p><b>Other: (if applicable, all that apply)</b></p> <ul style="list-style-type: none"> <li><input type="checkbox"/> Extrapulmonary infection (<i>see extra question</i>)*</li> <li><input type="checkbox"/> Prophylaxis only</li> </ul> |

## Investigator SCRIPT Pneumonia and Viral Episode Assessment and Outcome Evaluation

If **\*extrapulmonary infection**, choose site (**check all that apply**) and corresponding documentation:

| Site ( <i>check all that apply</i> )                               | Documentation ( <i>check most appropriate – only one</i> ) |                                  |                         |                         |
|--------------------------------------------------------------------|------------------------------------------------------------|----------------------------------|-------------------------|-------------------------|
|                                                                    | Definitive with positive culture                           | Definitive without culture proof | Radiologic/imaging only | Clinical suspicion only |
| <input type="checkbox"/> Cholangitis/cholecystitis                 | <input type="radio"/>                                      | <input type="radio"/>            | <input type="radio"/>   | <input type="radio"/>   |
| <input type="checkbox"/> Colitis /C. diff                          | <input type="radio"/>                                      | <input type="radio"/>            | <input type="radio"/>   | <input type="radio"/>   |
| <input type="checkbox"/> Other intra-abdominal (SBP, abcess, etc.) | <input type="radio"/>                                      | <input type="radio"/>            | <input type="radio"/>   | <input type="radio"/>   |
| <input type="checkbox"/> Line infection                            | <input type="radio"/>                                      | <input type="radio"/>            | <input type="radio"/>   | <input type="radio"/>   |
| <input type="checkbox"/> Tracheobronchitis                         | <input type="radio"/>                                      | <input type="radio"/>            | <input type="radio"/>   | <input type="radio"/>   |
| <input type="checkbox"/> Urinary Tract                             | <input type="radio"/>                                      | <input type="radio"/>            | <input type="radio"/>   | <input type="radio"/>   |
| <input type="checkbox"/> Wound/skin                                | <input type="radio"/>                                      | <input type="radio"/>            | <input type="radio"/>   | <input type="radio"/>   |
| <input type="checkbox"/> Empyema (unrelated to the index pna)      | <input type="radio"/>                                      | <input type="radio"/>            | <input type="radio"/>   | <input type="radio"/>   |
| <input type="checkbox"/> Other ( <i>please specify</i> ):<br>_____ | <input type="radio"/>                                      | <input type="radio"/>            | <input type="radio"/>   | <input type="radio"/>   |

|                                                                                                                         |                                                                                                                                                                                                                                                                                                                                                                                                                                                                                                                                                                                                                                                                                                                                                                             |
|-------------------------------------------------------------------------------------------------------------------------|-----------------------------------------------------------------------------------------------------------------------------------------------------------------------------------------------------------------------------------------------------------------------------------------------------------------------------------------------------------------------------------------------------------------------------------------------------------------------------------------------------------------------------------------------------------------------------------------------------------------------------------------------------------------------------------------------------------------------------------------------------------------------------|
| Were antibiotics for pneumonia discontinued on D14?                                                                     | <input type="radio"/> Yes*<br><input type="radio"/> No<br><input type="radio"/> N/A**(death/transfer to another institution)<br><br><i>*if Yes, finish following clinical impression and go to PCT</i><br><i>**if N/A, skip "clinical impression" questions and go to PCT</i>                                                                                                                                                                                                                                                                                                                                                                                                                                                                                               |
| If <b>no</b> , what date were antibiotics for pneumonia stopped?                                                        | Stop date for antibiotics for PNA: _____<br><br><input type="radio"/> Stop date unknown (patient was discharged on antibiotics for pneumonia)                                                                                                                                                                                                                                                                                                                                                                                                                                                                                                                                                                                                                               |
| Clinical Impression at <b>D14</b> :<br><br><br><br><br><br><br><br><br><br>*must be actively treated at this time point | <p><b>Pneumonia (Check best answers)</b></p> <input type="radio"/> Cure<br><input type="checkbox"/> Persistence ( <i>check all that apply</i> ) <ul style="list-style-type: none"> <li><input type="checkbox"/> Positive Culture</li> <li><input type="checkbox"/> Positive PCR</li> <li><input type="checkbox"/> Abscess / Cavity</li> <li><input type="checkbox"/> Empyema</li> <li><input type="checkbox"/> Endocarditis</li> <li><input type="checkbox"/> Other: _____</li> </ul> <input type="checkbox"/> Superinfection pneumonia<br><input type="checkbox"/> Indeterminate<br><br><p><b>Other: (if applicable, all that apply)</b></p> <input type="checkbox"/> Extrapulmonary infection ( <i>see extra question</i> )*<br><input type="checkbox"/> Prophylaxis only |

## Investigator SCRIPT Pneumonia and Viral Episode Assessment and Outcome Evaluation

If **\*extrapulmonary infection**, choose site (**check all that apply**) and corresponding documentation:

| Site ( <i>check all that apply</i> )                               | Documentation ( <i>check most appropriate – only one</i> ) |                                  |                         |                         |
|--------------------------------------------------------------------|------------------------------------------------------------|----------------------------------|-------------------------|-------------------------|
|                                                                    | Definitive with positive culture                           | Definitive without culture proof | Radiologic/imaging only | Clinical suspicion only |
| <input type="checkbox"/> Cholangitis/cholecystitis                 | <input type="radio"/>                                      | <input type="radio"/>            | <input type="radio"/>   | <input type="radio"/>   |
| <input type="checkbox"/> Colitis /C. diff                          | <input type="radio"/>                                      | <input type="radio"/>            | <input type="radio"/>   | <input type="radio"/>   |
| <input type="checkbox"/> Other intra-abdominal (SBP, abcess, etc.) | <input type="radio"/>                                      | <input type="radio"/>            | <input type="radio"/>   | <input type="radio"/>   |
| <input type="checkbox"/> Line infection                            | <input type="radio"/>                                      | <input type="radio"/>            | <input type="radio"/>   | <input type="radio"/>   |
| <input type="checkbox"/> Tracheobronchitis                         | <input type="radio"/>                                      | <input type="radio"/>            | <input type="radio"/>   | <input type="radio"/>   |
| <input type="checkbox"/> Urinary Tract                             | <input type="radio"/>                                      | <input type="radio"/>            | <input type="radio"/>   | <input type="radio"/>   |
| <input type="checkbox"/> Wound/skin                                | <input type="radio"/>                                      | <input type="radio"/>            | <input type="radio"/>   | <input type="radio"/>   |
| <input type="checkbox"/> Empyema (unrelated to the index pna)      | <input type="radio"/>                                      | <input type="radio"/>            | <input type="radio"/>   | <input type="radio"/>   |
| <input type="checkbox"/> Other ( <i>please specify</i> ):<br>_____ | <input type="radio"/>                                      | <input type="radio"/>            | <input type="radio"/>   | <input type="radio"/>   |

### PROCALCITONIN: (within 72 hrs of BAL/NBBAL Collection) [All categories]

|                                                                                                    |                                                                                                                                                                                                         |
|----------------------------------------------------------------------------------------------------|---------------------------------------------------------------------------------------------------------------------------------------------------------------------------------------------------------|
| Are serial PCTs available?<br><i>Note: minimum of 2 measurements within this treatment episode</i> | <input type="radio"/> Yes* <input type="radio"/> No                                                                                                                                                     |
| *If <b>yes</b> , does the patient meet PCT criteria for cure?                                      | <input type="radio"/> Yes, (check criteria below) <input type="radio"/> No<br><input type="checkbox"/> 80% change/decrease from baseline<br><input type="checkbox"/> Absolute value of $\leq 0.5$ ng/mL |

### IF FINAL EPISODE: [All categories]

#### Overall Global Clinical Cure *\*please refer to guidelines*

|                  |                                                                                                                                                                                                                                                                                                                                                                                                                                                                                                                                                                                                                                                                                                                                                                                                                                                                                                                                                                                                                   |                                                                                                                                                                                                                                                                                                                                                                                                                                                                                                                                                                                                                                                   |
|------------------|-------------------------------------------------------------------------------------------------------------------------------------------------------------------------------------------------------------------------------------------------------------------------------------------------------------------------------------------------------------------------------------------------------------------------------------------------------------------------------------------------------------------------------------------------------------------------------------------------------------------------------------------------------------------------------------------------------------------------------------------------------------------------------------------------------------------------------------------------------------------------------------------------------------------------------------------------------------------------------------------------------------------|---------------------------------------------------------------------------------------------------------------------------------------------------------------------------------------------------------------------------------------------------------------------------------------------------------------------------------------------------------------------------------------------------------------------------------------------------------------------------------------------------------------------------------------------------------------------------------------------------------------------------------------------------|
| Overall Success? | <input type="radio"/> <b>Yes</b><br>↳ If Yes, all criteria? (see text box below)<br><input type="radio"/> Yes<br><input type="radio"/> No<br>↳ If No, was patient extubated <b>before day 7</b> ?<br><input type="radio"/> Yes<br><input type="radio"/> No                                                                                                                                                                                                                                                                                                                                                                                                                                                                                                                                                                                                                                                                                                                                                        | <input type="radio"/> <b>No</b><br>↳ Cause of failure: *<br><input type="checkbox"/> Antibiotics for another indication in addition to suspected/proven PNA<br><input type="checkbox"/> Persistence ( <i>check all that apply</i> )<br><input type="checkbox"/> Positive Culture<br><input type="checkbox"/> Positive PCR<br><input type="checkbox"/> Abscess / Cavity<br><input type="checkbox"/> Empyema<br><input type="checkbox"/> Endocarditis<br><input type="checkbox"/> Other: _____<br><input type="checkbox"/> Persistent inflammation only<br><input type="checkbox"/> Recurrence<br><input type="checkbox"/> Superinfection pneumonia |
|                  | <div style="border: 1px solid black; padding: 5px;">                     1. survive duration of treatment<br/>                     2. able to stop antibiotics for pneumonia<br/>                         a. Continuation of same antibiotics &gt; 14 days but signs/symptoms of pneumonia stable (WBC, secretions, oxygenation, radiograph) or improving?<br/>                     3. causative pathogen disappears from respiratory secretions or no further samples<br/>                         a. %PMNs in repeat BAL &lt; 50% in non-neutropenic<br/>                     4. clinical manifestations of pneumonia improve/resolve (e.g., fever, secretions, WBC, hypoxemia, septic shock)<br/>                     5. ability to wean from vent or at least initiate SBTs<br/>                         a. Drop in minute ventilation and/or improvement in oxygenation<br/>                         b. Patient returned to pre-pneumonia ventilator/ECMO status or weaning from vent                 </div> | * <i>Check best answers</i>                                                                                                                                                                                                                                                                                                                                                                                                                                                                                                                                                                                                                       |
